# Supplementary material for: Psychiatric Hospitalization for Psychopathological Disorders and Self-Injurious Behaviors in Italian Children and Adolescents during COVID-19
Source: MDPI journal article supplement (doi:10.3390/children10121846), 2023-11-24
Supplement: s1 [file s1]

**Table S1.** Distribution of psychopathological diagnoses between the first quarantine period, first reference period, second quarantine period, and the second reference period.

| Diagnosis                      | Distribution among Admitted Patients            |                                                |                                                            |                                                           |
|--------------------------------|-------------------------------------------------|------------------------------------------------|------------------------------------------------------------|-----------------------------------------------------------|
|                                | First Quarantine Period<br>(March to June 2020) | First Reference Period<br>(March to June 2019) | Second Quarantine Period<br>(October 2020 to January 2021) | Second Reference Period<br>(October 2019 to January 2020) |
|                                | # (%)                                           | # (%)                                          | # (%)                                                      | # (%)                                                     |
| Psychosis                      | 14 (16.7)                                       | 21 (19.4)                                      | 20 (16.0)                                                  | 21 (20.6)                                                 |
| Mood disorders                 | 49 (58.3)                                       | 48 (44.4)                                      | 85 (68.0)                                                  | 50 (49.0)                                                 |
| Post-traumatic stress disorder | 10 (11.9)                                       | 16 (14.8)                                      | 13 (10.4)                                                  | 12 (11.8)                                                 |
| Behavior disorders             | 23 (13.1)                                       | 11 (21.3)                                      | 7 (5.6)                                                    | 19 (18.6)                                                 |

**Table S2.** Distribution of self-injurious behaviors between the first quarantine period, first reference period, second quarantine period, and the second reference period.

| Self-Injurious Behaviors              | Distribution among Admitted Patients            |                                                |                                                            |                                                           |
|---------------------------------------|-------------------------------------------------|------------------------------------------------|------------------------------------------------------------|-----------------------------------------------------------|
|                                       | First Quarantine Period<br>(March to June 2020) | First Reference Period<br>(March to June 2019) | Second Quarantine Period<br>(October 2020 to January 2021) | Second Reference Period<br>(October 2019 to January 2020) |
|                                       | # (%)                                           | # (%)                                          | # (%)                                                      | # (%)                                                     |
| Non-suicidal self-injurious behaviors | 45 (56.3)                                       | 37 (46.3)                                      | 71 (47.3)                                                  | 40 (47.6)                                                 |
| Suicidal ideation                     | 24 (30)                                         | 21 (26.3)                                      | 56 (37.3)                                                  | 32 (38.1)                                                 |
| Suicide attempts                      | 11 (13.8)                                       | 22 (27.5)                                      | 23 (15.3)                                                  | 12 (14.3)                                                 |
